# Supplementary material
Source: Research Square preprint supplement (doi:10.21203/rs.3.rs-9169705/v1)
Supplement: Supplementary file 1 [file 86063913927527312a133ffd.docx]

**Highlights:**

*Carica pap*aya Latex,

Green synthesis,

Cadmium oxide nanoparticles,

anticancer, antibacterial and photocatalytic activity
