# Supplementary material
Source: Research Square preprint supplement (doi:10.21203/rs.3.rs-9169705/v1)

**Graphical Abstract**


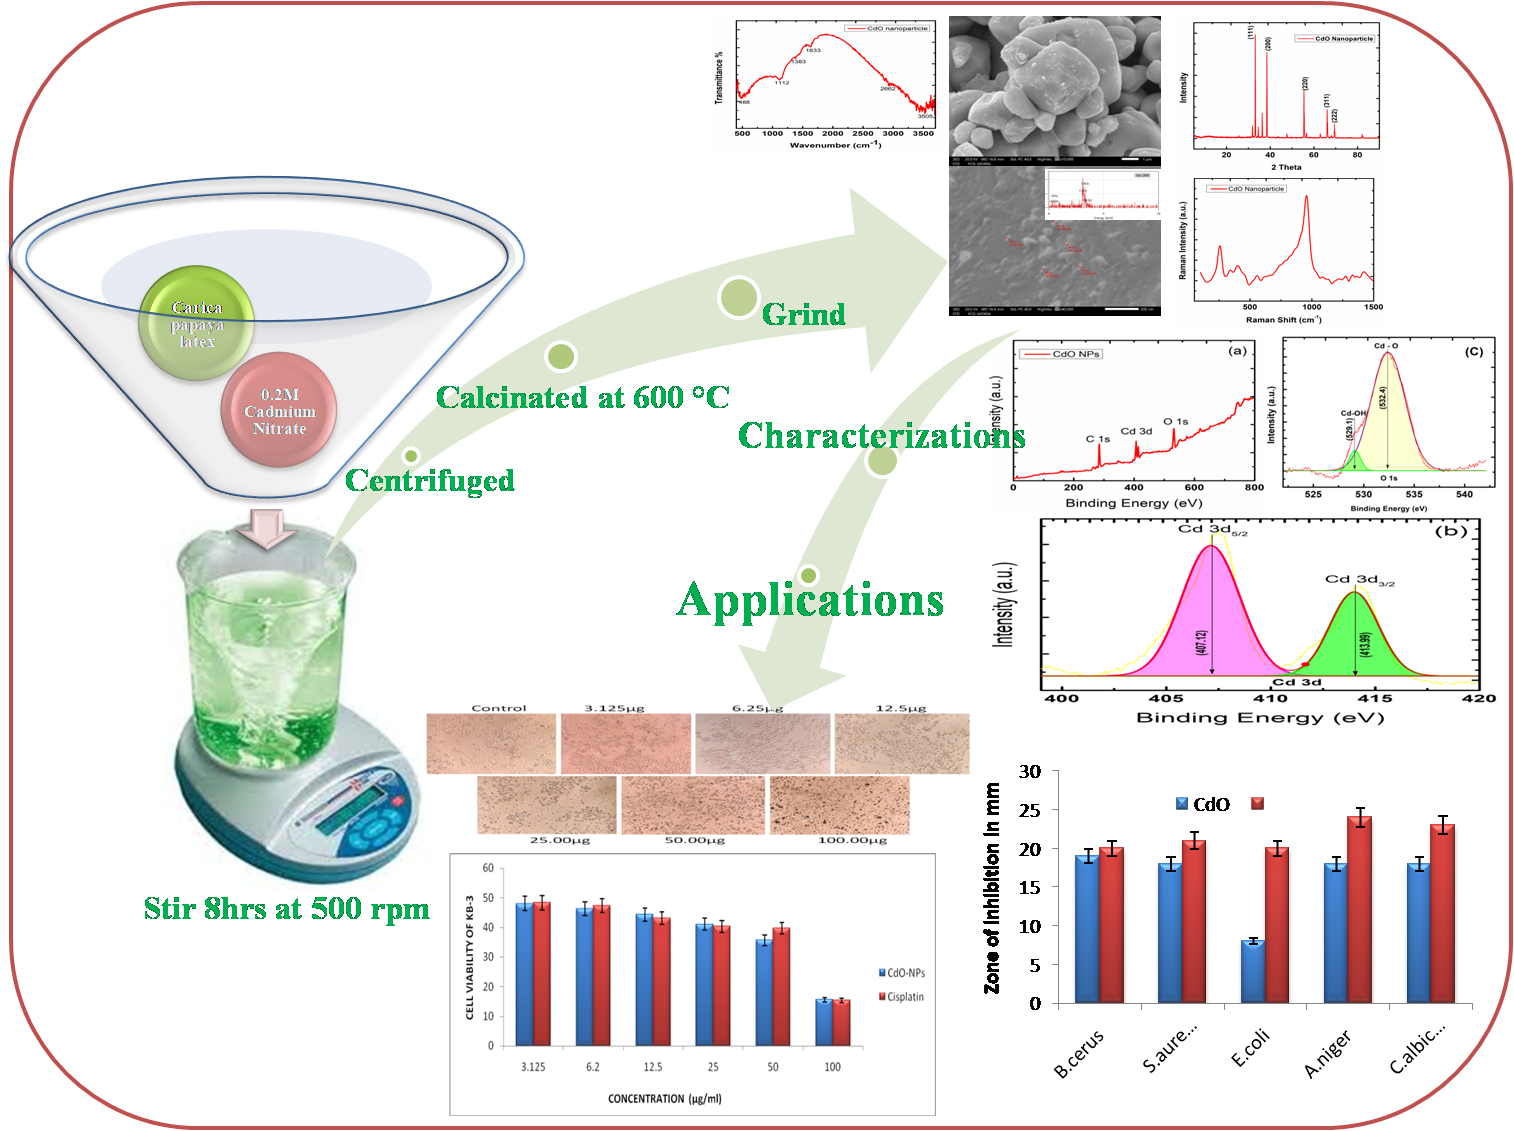

Supplement: Supplementary file 2 [file ccdf7e478e9620482897845c.docx]
